# Supplementary material for: Pneumocystis Exacerbates Inflammation and Mucus Hypersecretion in a Murine, Elastase-Induced-COPD Model
Source: MDPI journal article supplement (doi:10.3390/jof9040452), 2023-04-07
Supplement: s1 [file s1]

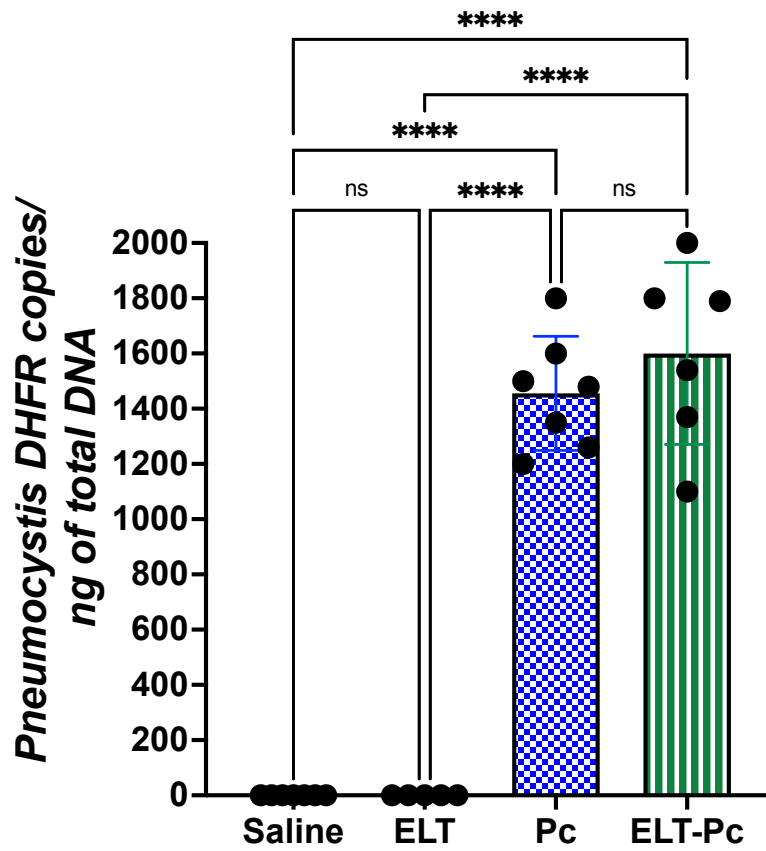

**Figure S1. Quantification of the burden of *Pneumocystis*.** *dhfr* gene levels were evaluated by qPCR. Data were determined using interpolation of each Ct in a calibration curve. Data were expressed as mean $\pm$ SD and were adjusted to 100 ng of total genomic DNA for each sample. All data was analyzed by ANOVA. ns = non-significant; \*\*\*\* =  $p < 0.0001$ .
